# Supplementary material
Source: MDPI journal article supplement (https://www.mdpi.com/2071-1050/12/3/1282)
Supplement: s1 [file s1]

## Supplementary Data

**Table S1.** Predictive climatic variables considered to estimate the potential distribution of the Chinese pangolin in Nepal, downloaded from the WorldClim database. Variables in bold were used in the final model. Variables used in the model construction were selected based on jackknife analysis and the less correlated variables ( $|r| < 0.70$ ).

| <b>Variables</b>                                     | <b>Variable code</b> | <b>Descriptions</b>                                                                                             |
|------------------------------------------------------|----------------------|-----------------------------------------------------------------------------------------------------------------|
| Annual Mean Temperature                              | Bio_01               | Average annual temperature                                                                                      |
| Mean Diurnal Range                                   | Bio_02               | Average of the differences between monthly maximum and minimum temperatures                                     |
| Isothermality                                        | Bio_03               | Ratio of the mean diurnal range to the annual temperature range X 100                                           |
| Temperature Seasonality                              | Bio_04               | Standard deviation of monthly mean temperatures                                                                 |
| Max Temperature of Warmest Month                     | Bio_05               | The maximum monthly temperature in a year                                                                       |
| Min Temperature of Coldest Month                     | Bio_06               | The minimum monthly temperature in a year                                                                       |
| Annual Temperature Range (BIO5-BIO6)                 | Bio_07               | The temperature variation between maximum temperature of warmest month and minimum temperature of coldest month |
| Mean Temperature of Wettest Quarter                  | Bio_08               | Average of the mean temperature in the wettest three months                                                     |
| Mean Temperature of Driest Quarter                   | Bio_09               | Average of the mean temperature in the driest three months                                                      |
| Mean Temperature of Warmest Quarter                  | Bio_10               | Average of the mean temperatures in the warmest three months                                                    |
| Mean Temperature of Coldest Quarter                  | Bio_11               | Average of the mean temperatures in the coldest three months                                                    |
| Annual Precipitation                                 | Bio_12               | Total annual precipitation                                                                                      |
| Precipitation of Wettest Month                       | Bio_13               | Total precipitation in the wettest month                                                                        |
| Precipitation of Driest Month                        | Bio_14               | Total precipitation in the driest month                                                                         |
| Precipitation Seasonality (Coefficient of Variation) | Bio_15               | Coefficient of variation of monthly total precipitations $\times 100$                                           |
| Precipitation of Wettest Quarter                     | Bio_16               | Total precipitation in the wettest three months                                                                 |
| Precipitation of Driest Quarter                      | Bio_17               | Total precipitation in the driest three months                                                                  |
| Precipitation of Warmest Quarter                     | Bio_18               | Total precipitation in the warmest three months                                                                 |
| Precipitation of Coldest Quarter                     | Bio_19               | Total precipitation in the coldest three months                                                                 |

**Table S2.** Landsat data used in this study.

| <b>Path/Row</b> | <b>2016 (Landsat 8 OLI)</b> |
|-----------------|-----------------------------|
| 139/ 041-042    | 077 (DOY)                   |
| 140/041-042     | 119-292 (DOY)               |

**Table S3.** A modified land cover classification scheme.

| Land Cover Types  | Description                                                                                                                                 |
|-------------------|---------------------------------------------------------------------------------------------------------------------------------------------|
| Settlements       | Human settlements in urban and rural areas, commercial areas, industrial areas, construction areas, traffic, airports, public service areas |
| Cultivated land   | Wet and dry croplands, orchards                                                                                                             |
| Forest land       | Evergreen broadleaf forest, deciduous forest, scattered forest, low-density sparse forest, degraded forest                                  |
| Bush (Shrub) land | Mix of small trees (<5 m tall) and other natural covers                                                                                     |
| Barren land       | Cliffs/small landslides, bare rocks, other permanently abandoned rock land, sand areas, other unused lands, river banks                     |
| Grassland         | Mainly fields from dense to low coverage of grass                                                                                           |
| Others            | Irrigation canal, dams, or wetlands with permanent mixtures of open water and marsh                                                         |

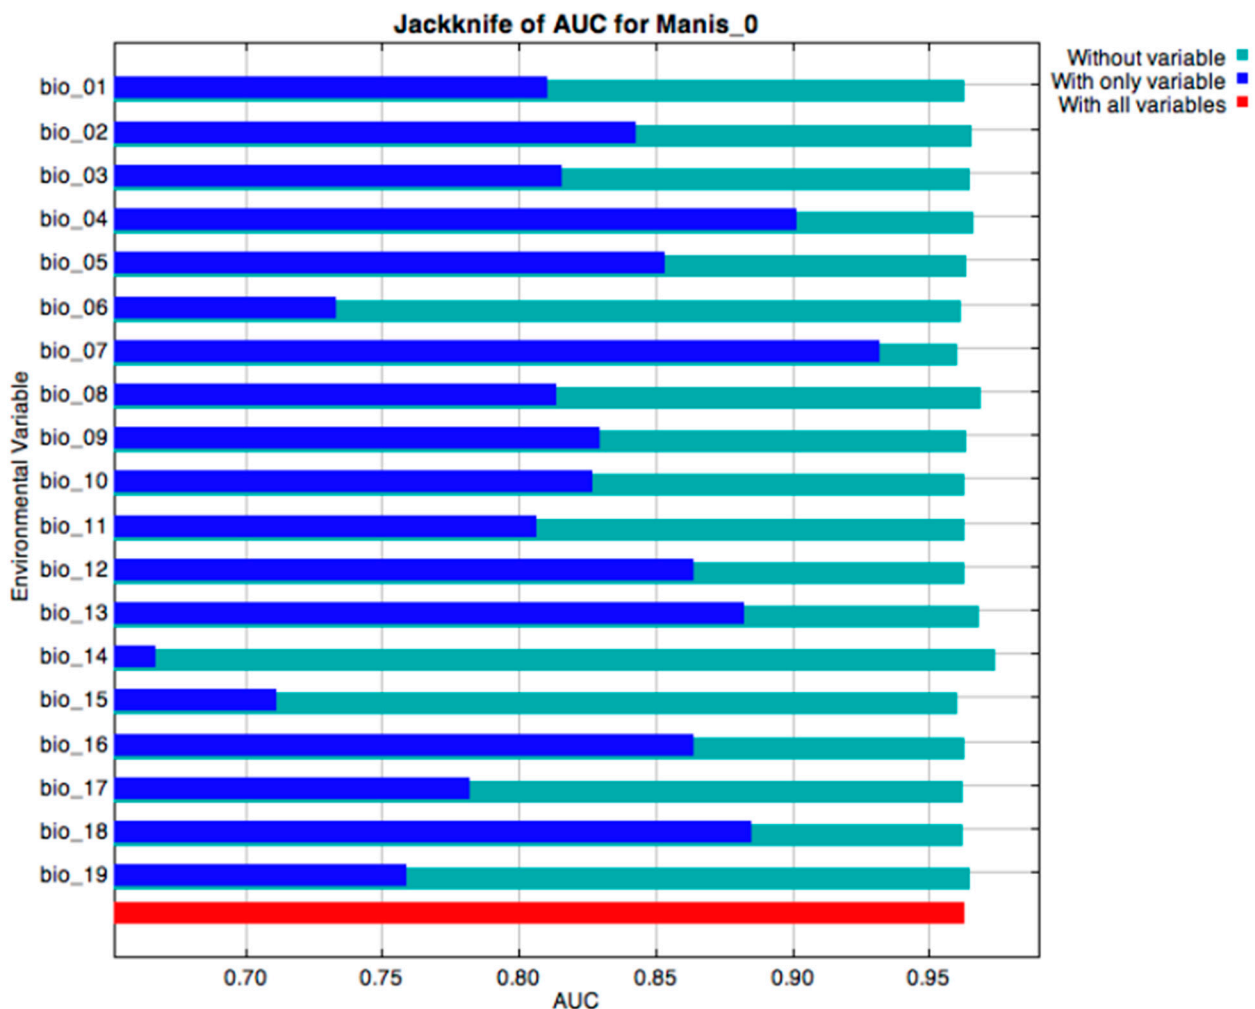

**Figure S1.** Jackknife test for the variables used in Maxent modeling to estimate the potential distribution of the Chinese pangolin in Nepal.

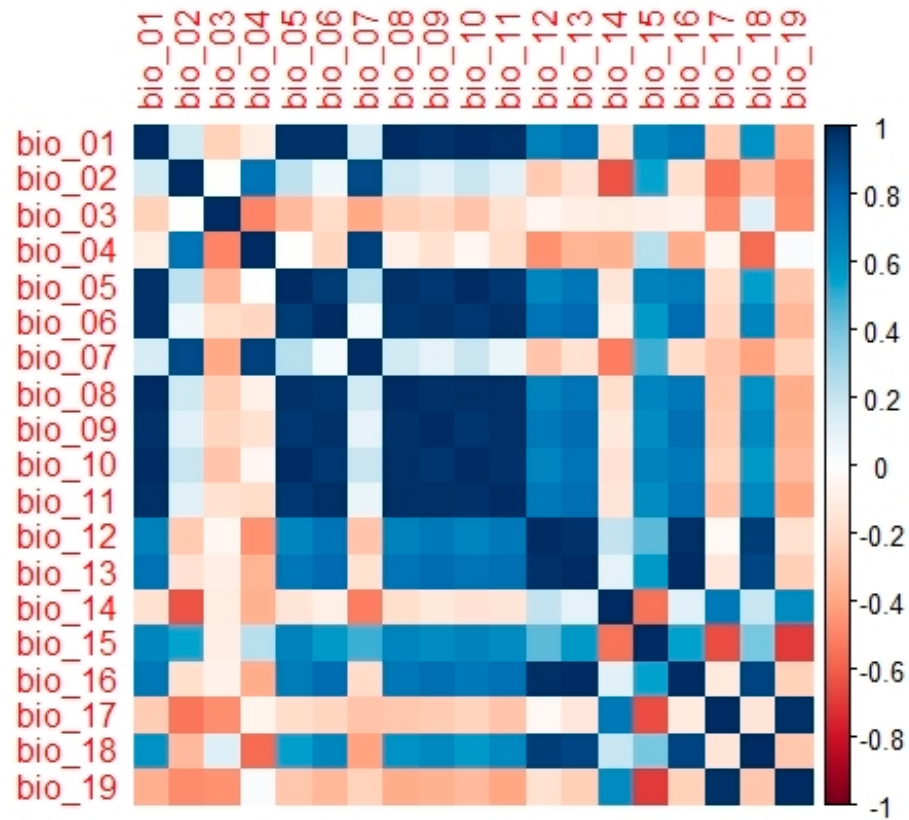

**Figure S2.** Spearman pairwise correlation coefficients between predictive variables considered in the Chinese pangolin model. The variables selected for the final model did not contain any highly correlated variables ( $|r| > 0.70$ ).

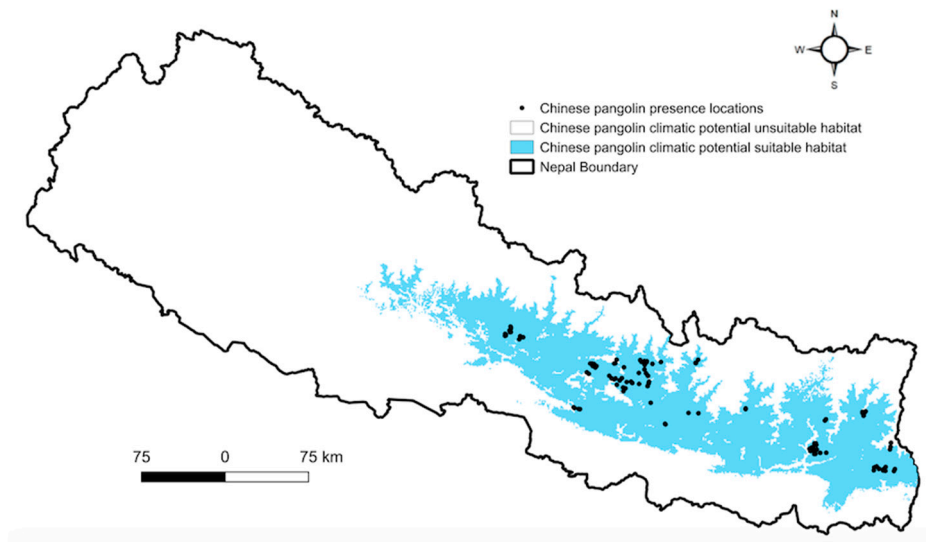

**Figure S3.** The Chinese pangolin's climatic suitable habitat and occurrence points.

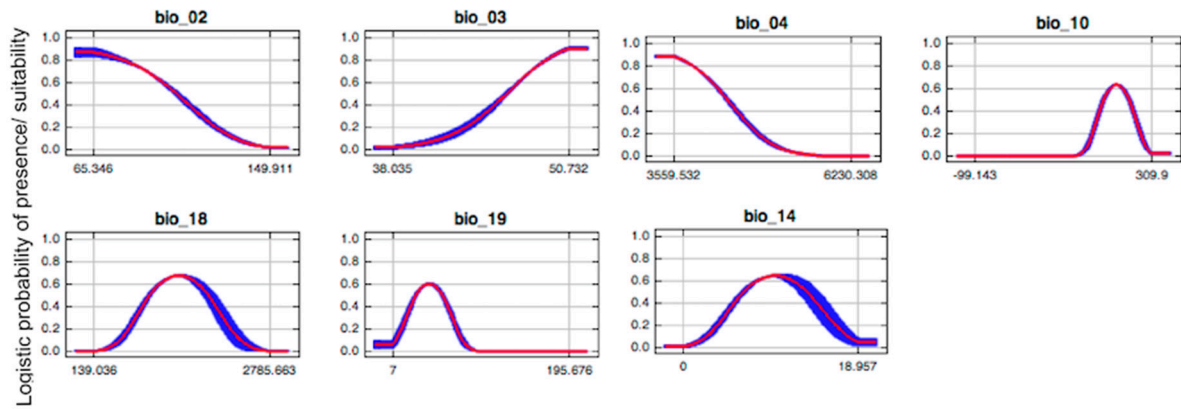

**Figure S4.** Response curves of seven bioclimatic variables in the Chinese pangolin's habitat distribution model. (Bio\_2: Mean Diurnal Temperature Range (Mean of monthly temperatures (max temp–min temp)) (°C); Bio\_3: Isothermality (°C); Bio\_4: Temperature Seasonality (°C); Bio\_10: Maximum Temperature of the Warmest Month (°C); Bio14: Precipitation of Driest Month (mm); Bio\_18: Precipitation of the Driest Quarter (mm); Bio19: Precipitation of Coldest Quarter (mm)).

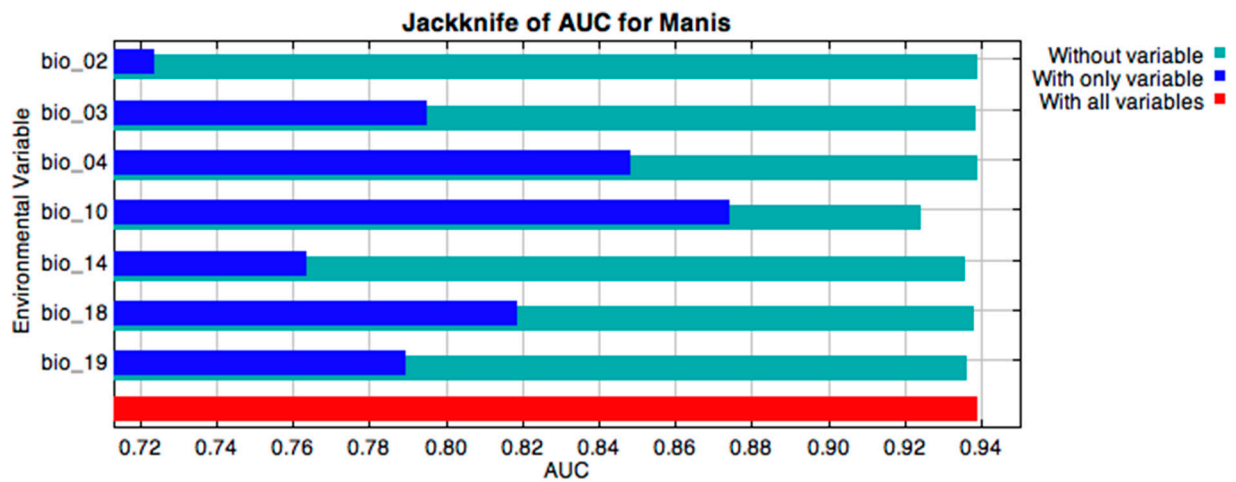

**Figure S5.** Variable contribution of Maxent modeling to estimating the potential distribution of the Chinese pangolin in Nepal.
